# Supplementary material
Source: Research Square preprint supplement (doi:10.21203/rs.3.rs-9291961/v1)
Supplement: Supplementary file 1 [file 6ae7c65ee7fe61c4bf2704ab.docx]

**Appendix 1.** Eligibility criteria by stakeholder group

| **Patients**   - Patients with a primary TKA for 1-5 years - TKA was performed based on a clinical diagnosis of knee osteoarthritis - ≥ 18 years of age - Dutch as native language - No hearing or speech impairment - Able and willing to participate and provide informed consent   **Physiotherapists**   - Working in the Netherlands - ≥ 3 years working experience as a physiotherapist in TKA rehabilitation - ≥ 10 post-TKA patients a year - Dutch as native language - No hearing or speech impairment - Able and willing to participate and provide informed consent   **Orthopedic surgeons**   - Working in the Netherlands - ≥ 3 years working experience as an orthopedic surgeon in TKA surgery - ≥ 30 primary TKA procedures a year - Dutch as native language - No hearing or speech impairment - Able and willing to participate and provide informed consent |
| --- |

TKA: total knee arthroplasty

**Appendix 2.** Semi-structured interview guide.

| **Topic** | **Example questions** |
| --- | --- |
| Most relevant outcome domains of recovery during TKA rehabilitation | - What are the most important outcomes of TKA for you that determined whether or not you were satisfied with your prosthetic knee? *(patients)* - What are the most important outcomes of TKA for you that determine whether you consider your patients’ recovery in the year after TKA to be successful or not? *(physiotherapists and orthopedic surgeons)* - Why are this important outcomes for you? |
| How and when to identify delayed recovery during TKA rehabilitation | - When do you consider recovery to be delayed during the year following your TKA? *(patients)* - When do you consider your patients’ recovery to be delayed during the year following the TKA? *(physiotherapists and orthopedic surgeons)* - Why do you believe there is a delayed recovery in that case? |
| Most important prognostic factors for recovery during TKA rehabilitation | - What were the most important factors that played a positive / negative role in your recovery during the year following the TKA? *(patients)* - What do you consider to be the most important factors that play a positive / negative role in your patients’ recovery during the year following the TKA? *(physiotherapists and orthopedic surgeons)* - How do you believe these factors influenced your recovery after TKA? *(patients)* - How do you believe these factors influence your patients’ recovery after TKA? *(physiotherapists and orthopedic surgeons)* - Which of the factors described in the literature do you consider most relevant for recovery after TKA? Why? - Which of the factors described in the literature do you consider irrelevant for recovery after TKA? Why? |

TKA: total knee arthroplasty

**Appendix 3**. Pubmed search strategy

(((total knee [tiab] OR total knee arthroplasty [tiab] OR total knee replacement [tiab] OR knee joint arthroplasty [tiab] OR knee joint arthroplasties [tiab] OR knee replacement* [tiab] OR TKA [tiab]) OR (("Arthroplasty, Replacement, Knee"[Mesh]) OR "Knee Prosthesis"[Mesh])) AND ((("Prognosis"[Mesh]) OR "Risk Factors"[Mesh]) OR (predict* [tiab] OR risk factor* [tiab] OR prognosis [tiab] OR prognostic [tiab] OR determinant* [tiab]))) AND ((((((((((((((("Return to Work"[Mesh]) OR "Quality of Life"[Mesh]) OR "Pain"[Mesh]) OR "Pain Measurement"[Mesh]) OR "Recovery of Function"[Mesh]) OR "Mobility Limitation"[Mesh]) OR "Range of Motion, Articular"[Mesh]) OR "Outcome Assessment, Health Care"[Mesh]) OR "Patient Reported Outcome Measures"[Mesh]) OR "Patient Satisfaction"[Mesh]) OR "Prosthesis Failure"[Mesh]) OR "Reoperation"[Mesh]) OR "Postoperative Period"[Mesh]) OR "Long Term Adverse Effects"[Mesh]) OR (physical functioning [tiab] OR quality of life [tiab] OR mobility limitation [tiab] OR return to work [tiab] OR functional recovery [tiab] OR pain [tiab] OR disability [tiab] OR functional status [tiab] OR PROM [tiab] OR function* OR patient satisfaction [tiab] OR revision [tiab] OR post-operative complications [tiab])) AND (meta-analysis[Filter] OR review[Filter] OR systematicreview[Filter]) AND (meta-analysis[Filter] OR review[Filter] OR systematicreview[Filter])
